# Supplementary material for: Resveratrol induces DNA damage-mediated cancer cell senescence through the DLC1–DYRK1A–EGFR axis
Source: Royal Society of Chemistry journal article supplement (doi:10.1039/d2fo01188c), 2022-12-29

### MTT MDA-MB-231

| RES/ $\mu$ M           | 0     | DMSO  | 20    | 60    | 100   | 140   | 180   |
|------------------------|-------|-------|-------|-------|-------|-------|-------|
| OD value<br>MDA-MB-231 | 0.682 | 0.828 | 0.544 | 0.401 | 0.4   | 0.186 | 0.134 |
|                        | 0.821 | 0.766 | 0.534 | 0.532 | 0.34  | 0.189 | 0.143 |
|                        | 0.651 | 0.571 | 0.689 | 0.4   | 0.268 | 0.183 | 0.138 |
| average                | 0.718 | 0.722 | 0.589 | 0.444 | 0.336 | 0.186 | 0.138 |
| ratio                  | 1     | 1.005 | 0.82  | 0.62  | 0.47  | 0.26  | 0.19  |
| RES/ $\mu$ M           | 0     | DMSO  | 20    | 60    | 100   | 140   | 180   |
| OD value<br>MDA-MB-231 | 0.565 | 0.523 | 0.544 | 0.351 | 0.279 | 0.183 | 0.125 |
|                        | 0.527 | 0.567 | 0.504 | 0.325 | 0.273 | 0.212 | 0.151 |
|                        | 0.531 | 0.508 | 0.509 | 0.369 | 0.264 | 0.198 | 0.101 |
| average                | 0.541 | 0.533 | 0.519 | 0.348 | 0.272 | 0.198 | 0.126 |
| ratio                  | 1     | 0.98  | 0.96  | 0.64  | 0.5   | 0.37  | 0.233 |
| RES/ $\mu$ M           | 0     | DMSO  | 20    | 60    | 100   | 140   | 180   |
| OD value<br>MDA-MB-231 | 1.013 | 1.017 | 0.861 | 0.669 | 0.502 | 0.195 | 0.143 |
|                        | 1.147 | 1.032 | 1.095 | 0.589 | 0.509 | 0.262 | 0.165 |
|                        | 1.005 | 0.995 | 1.203 | 0.479 | 0.411 | 0.221 | 0.169 |
| average                | 1.055 | 1.015 | 1.053 | 0.579 | 0.474 | 0.226 | 0.159 |
| ratio                  | 1     | 0.96  | 1     | 0.55  | 0.45  | 0.21  | 0.15  |

### MTT MCF-7

| RES/ $\mu$ M      | 0     | DMSO  | 20    | 60    | 100   | 140   | 180   |
|-------------------|-------|-------|-------|-------|-------|-------|-------|
| OD value<br>MCF-7 | 0.663 | 0.61  | 0.675 | 0.393 | 0.288 | 0.206 | 0.204 |
|                   | 0.765 | 0.643 | 0.659 | 0.473 | 0.342 | 0.276 | 0.156 |
|                   | 0.752 | 0.715 | 0.607 | 0.439 | 0.354 | 0.227 | 0.174 |
| average           | 0.727 | 0.656 | 0.647 | 0.435 | 0.328 | 0.236 | 0.178 |
| ratio             | 1     | 0.90  | 0.89  | 0.60  | 0.45  | 0.33  | 0.25  |
| RES/ $\mu$ M      | 0     | DMSO  | 20    | 60    | 100   | 140   | 180   |
| OD value<br>MCF-7 | 0.752 | 0.716 | 0.772 | 0.581 | 0.423 | 0.288 | 0.206 |
|                   | 0.704 | 0.737 | 0.602 | 0.556 | 0.398 | 0.239 | 0.187 |
|                   | 0.737 | 0.74  | 0.687 | 0.486 | 0.406 | 0.218 | 0.242 |
| average           | 0.731 | 0.731 | 0.687 | 0.541 | 0.409 | 0.248 | 0.212 |
| ratio             | 1     | 1     | 0.94  | 0.74  | 0.56  | 0.34  | 0.29  |
| RES/ $\mu$ M      | 0     | DMSO  | 20    | 60    | 100   | 140   | 180   |
| OD value<br>MCF-7 | 0.752 | 0.798 | 0.700 | 0.542 | 0.356 | 0.288 | 0.206 |
|                   | 0.890 | 0.727 | 0.670 | 0.506 | 0.468 | 0.249 | 0.267 |
|                   | 0.837 | 0.902 | 0.709 | 0.686 | 0.439 | 0.306 | 0.220 |
| average           | 0.826 | 0.809 | 0.693 | 0.578 | 0.421 | 0.281 | 0.231 |
| ratio             | 1     | 0.98  | 0.84  | 0.7   | 0.51  | 0.34  | 0.28  |

## MTT HepG2

| RES/ $\mu$ M   | 0     | DMSO  | 20    | 60    | 100   | 140   | 180   |
|----------------|-------|-------|-------|-------|-------|-------|-------|
| OD value HepG2 | 1.192 | 1.029 | 0.988 | 0.7   | 0.425 | 0.358 | 0.201 |
|                | 1.057 | 1.085 | 0.948 | 0.738 | 0.536 | 0.367 | 0.211 |
|                | 1.126 | 1.06  | 1.103 | 0.722 | 0.491 | 0.355 | 0.263 |
| average        | 1.125 | 1.058 | 1.013 | 0.72  | 0.484 | 0.36  | 0.225 |
| ratio          | 1     | 0.94  | 0.9   | 0.64  | 0.43  | 0.32  | 0.2   |
| RES/ $\mu$ M   | 0     | DMSO  | 20    | 60    | 100   | 140   | 180   |
| OD value HepG2 | 0.777 | 0.749 | 0.628 | 0.458 | 0.366 | 0.251 | 0.155 |
|                | 0.741 | 0.706 | 0.738 | 0.496 | 0.324 | 0.211 | 0.152 |
|                | 0.759 | 0.732 | 0.842 | 0.48  | 0.357 | 0.222 | 0.149 |
| average        | 0.759 | 0.729 | 0.736 | 0.478 | 0.349 | 0.228 | 0.152 |
| ratio          | 1     | 0.96  | 0.97  | 0.63  | 0.46  | 0.3   | 0.2   |
| RES/ $\mu$ M   | 0     | DMSO  | 20    | 60    | 100   | 140   | 180   |
| OD value HepG2 | 0.908 | 0.987 | 0.787 | 0.628 | 0.445 | 0.262 | 0.167 |
|                | 0.887 | 0.896 | 0.709 | 0.692 | 0.44  | 0.302 | 0.201 |
|                | 0.875 | 0.799 | 0.694 | 0.708 | 0.423 | 0.318 | 0.112 |
| average        | 0.89  | 0.894 | 0.73  | 0.676 | 0.436 | 0.294 | 0.16  |
| ratio          | 1     | 1     | 0.82  | 0.76  | 0.49  | 0.33  | 0.18  |

## MTT WRL68

| RES/ $\mu$ M   | 0     | DMSO  | 20    | 60    | 100   | 140   | 180   |
|----------------|-------|-------|-------|-------|-------|-------|-------|
| OD value WLR68 | 0.471 | 0.429 | 0.53  | 0.402 | 0.37  | 0.303 | 0.25  |
|                | 0.493 | 0.449 | 0.525 | 0.374 | 0.318 | 0.302 | 0.264 |
|                | 0.426 | 0.466 | 0.46  | 0.375 | 0.342 | 0.293 | 0.273 |
|                | 0.494 | 0.429 | 0.496 | 0.379 | 0.335 | 0.318 | 0.259 |
|                | 0.417 | 0.411 | 0.499 | 0.366 | 0.309 | 0.266 | 0.243 |
| average        | 0.460 | 0.437 | 0.502 | 0.379 | 0.335 | 0.296 | 0.258 |
| ratio          | 1     | 0.95  | 1.1   | 0.82  | 0.73  | 0.64  | 0.56  |
| RES/ $\mu$ M   | 0     | DMSO  | 20    | 60    | 100   | 140   | 180   |
| OD value WLR68 | 0.22  | 0.219 | 0.249 | 0.199 | 0.169 | 0.164 | 0.145 |
|                | 0.249 | 0.213 | 0.219 | 0.306 | 0.194 | 0.205 | 0.16  |
|                | 0.245 | 0.225 | 0.242 | 0.273 | 0.247 | 0.201 | 0.166 |
|                | 0.255 | 0.222 | 0.218 | 0.229 | 0.251 | 0.175 | 0.182 |
| average        | 0.242 | 0.220 | 0.232 | 0.252 | 0.215 | 0.186 | 0.163 |
| ratio          | 1     | 0.91  | 0.96  | 1.04  | 0.89  | 0.77  | 0.67  |
| RES/ $\mu$ M   | 0     | DMSO  | 20    | 60    | 100   | 140   | 180   |
| OD value WLR68 | 0.723 | 0.678 | 0.861 | 0.708 | 0.699 | 0.667 | 0.479 |
|                | 0.789 | 0.874 | 0.775 | 0.863 | 0.704 | 0.614 | 0.538 |
|                | 0.891 | 0.779 | 0.815 | 0.808 | 0.688 | 0.618 | 0.594 |
| average        | 0.801 | 0.777 | 0.817 | 0.793 | 0.697 | 0.633 | 0.537 |
| ratio          | 1     | 0.97  | 1.02  | 0.99  | 0.87  | 0.79  | 0.67  |

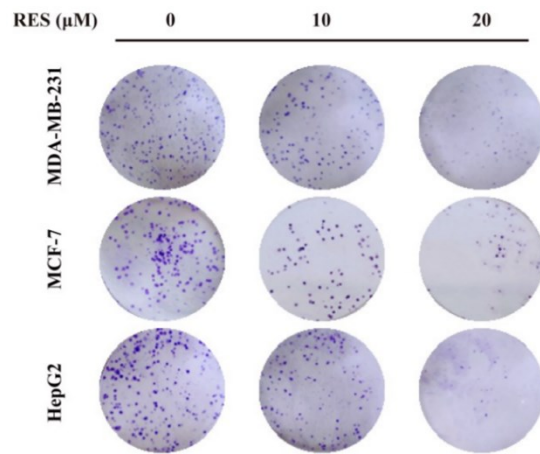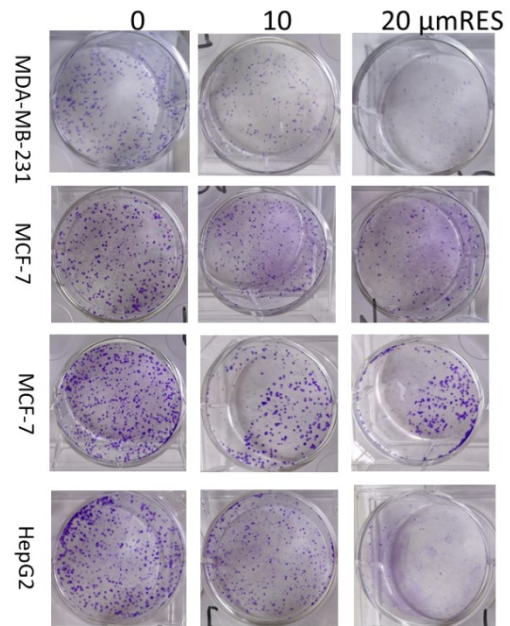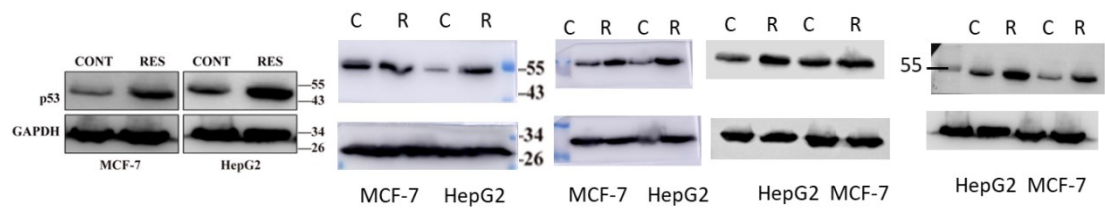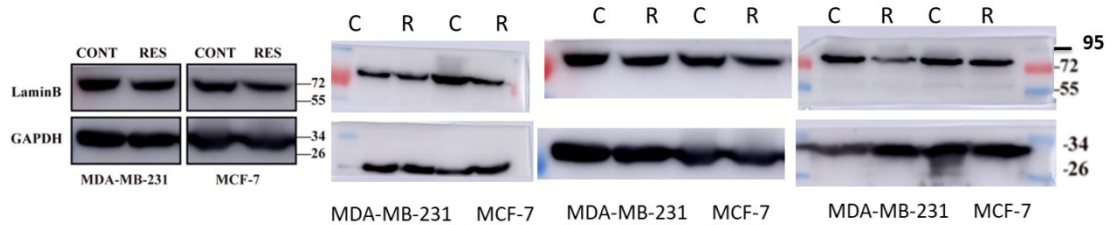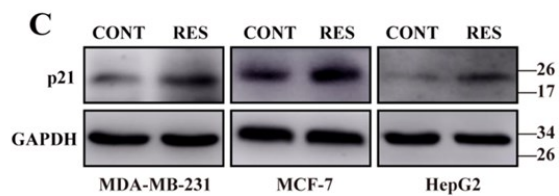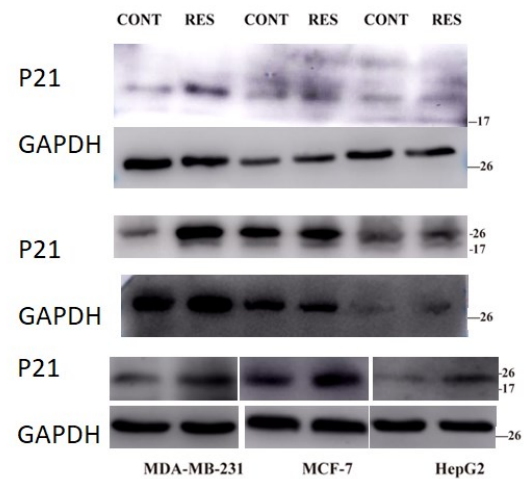

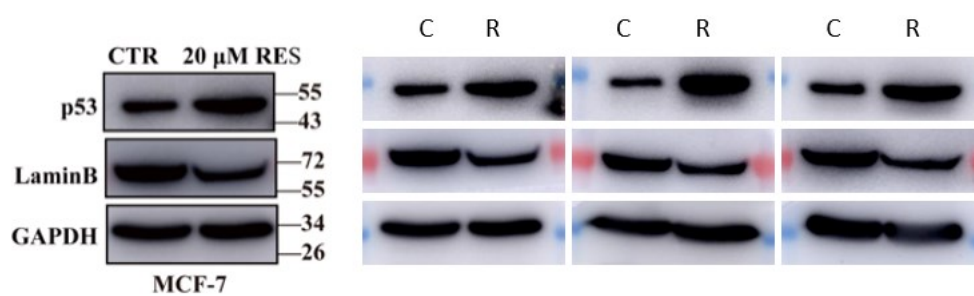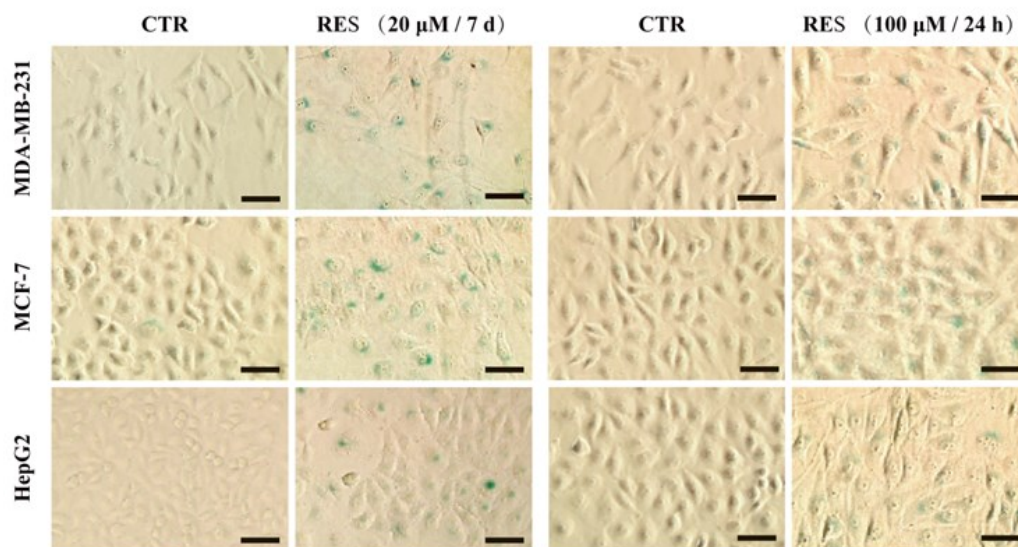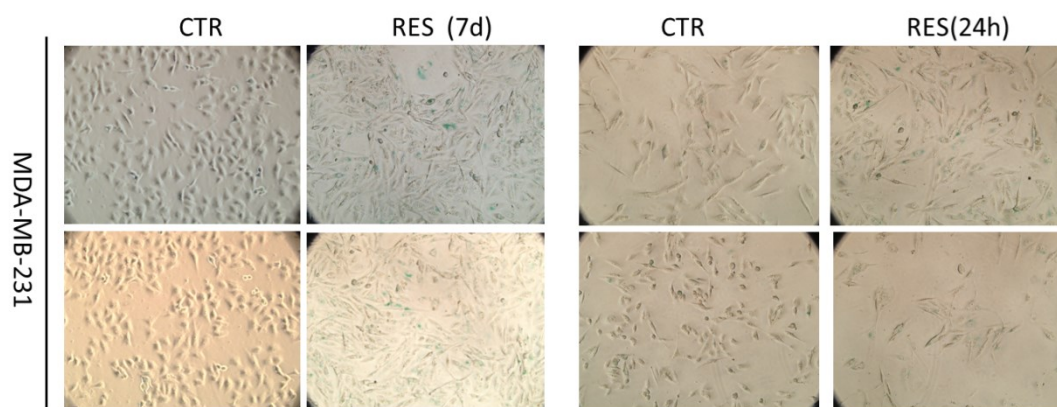



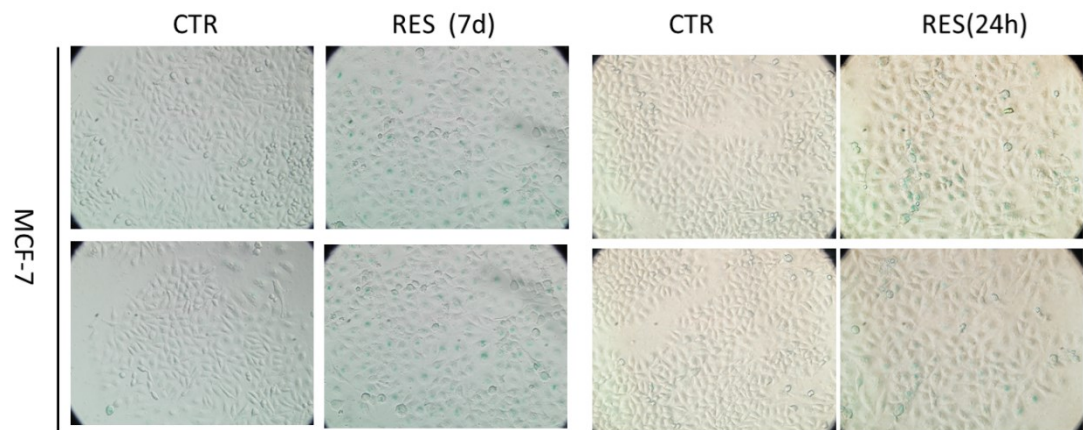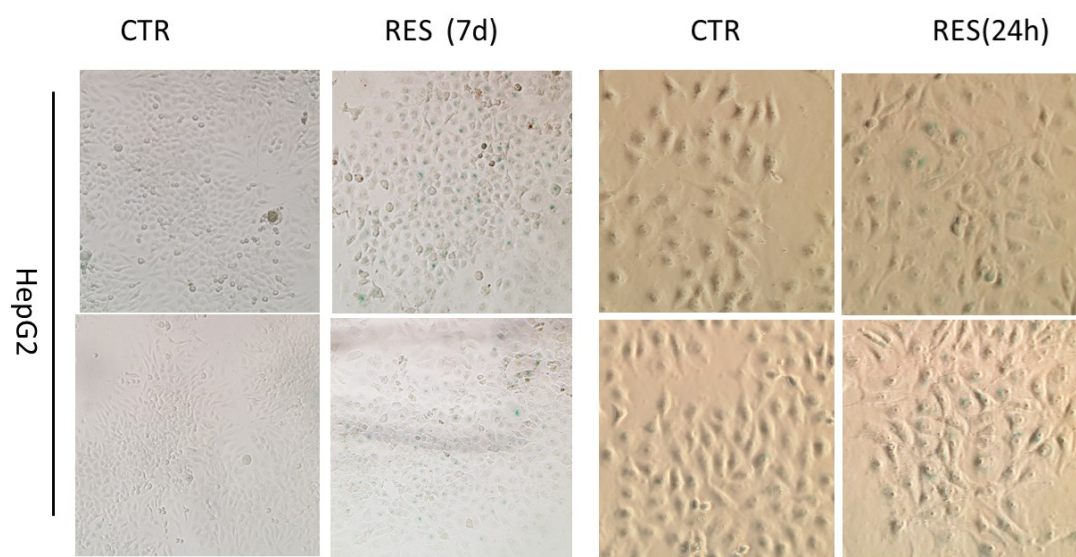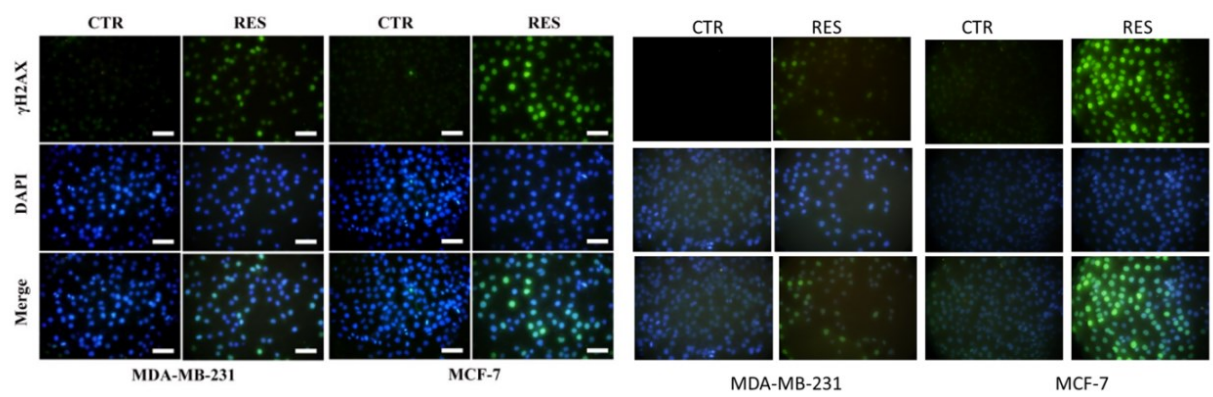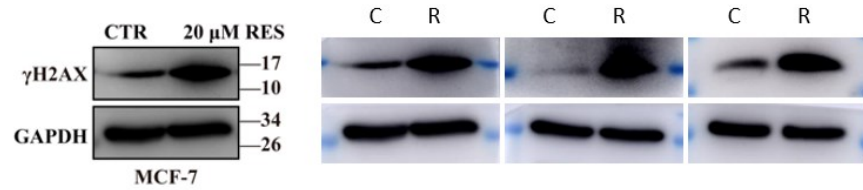

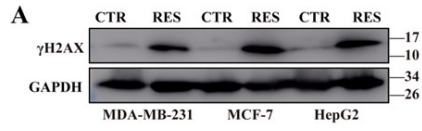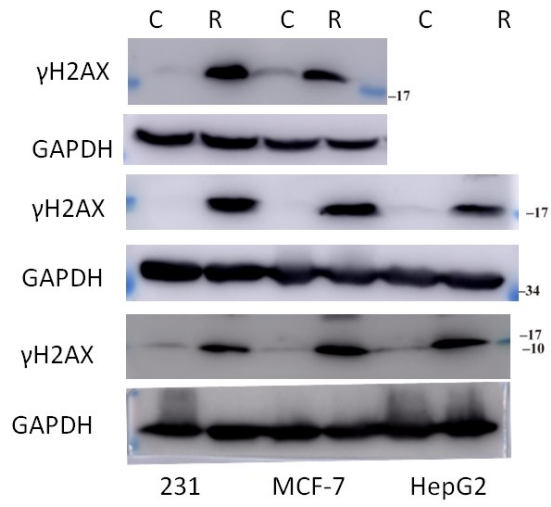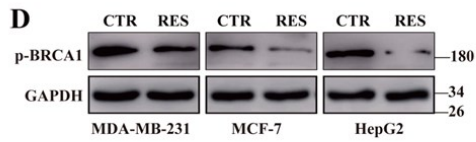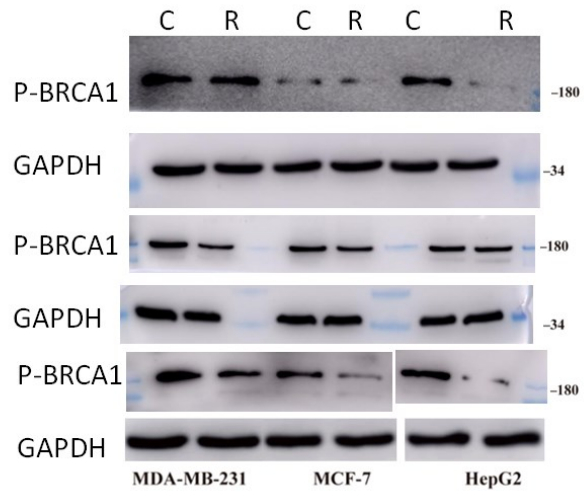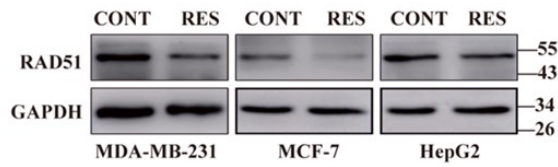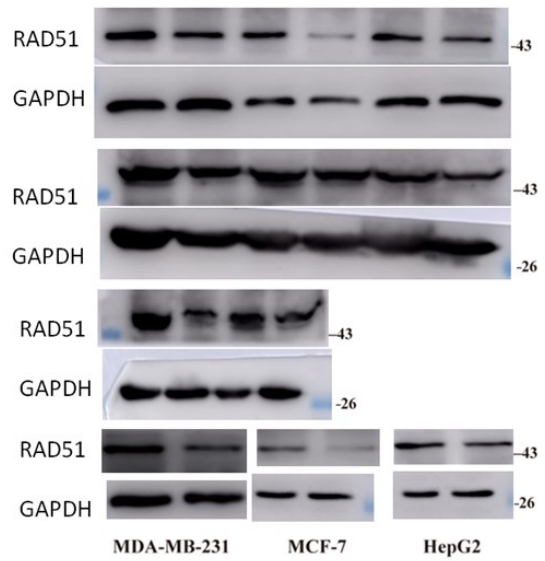

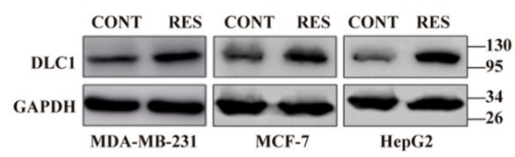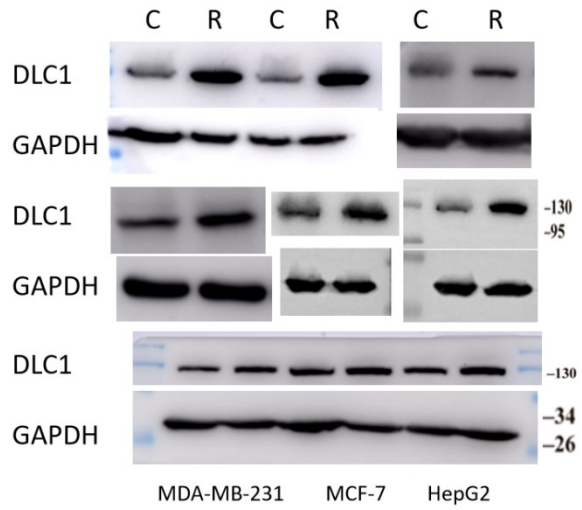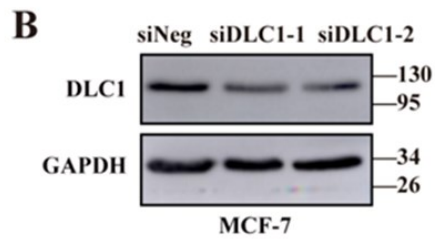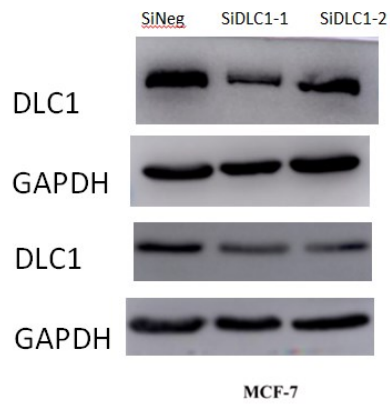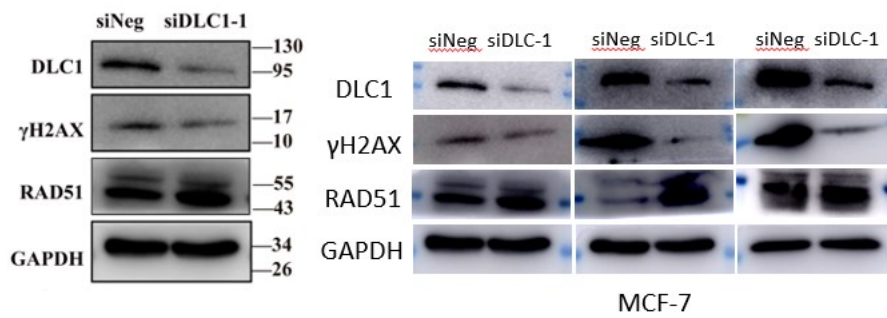

**D**

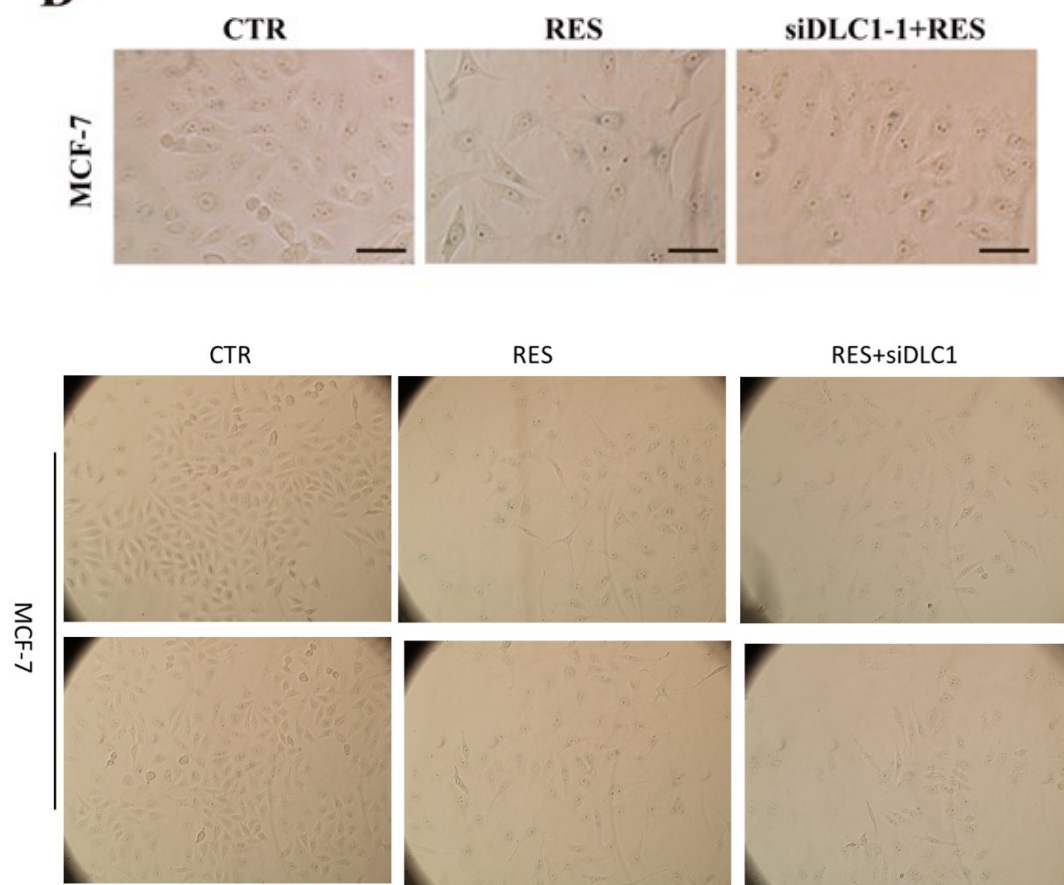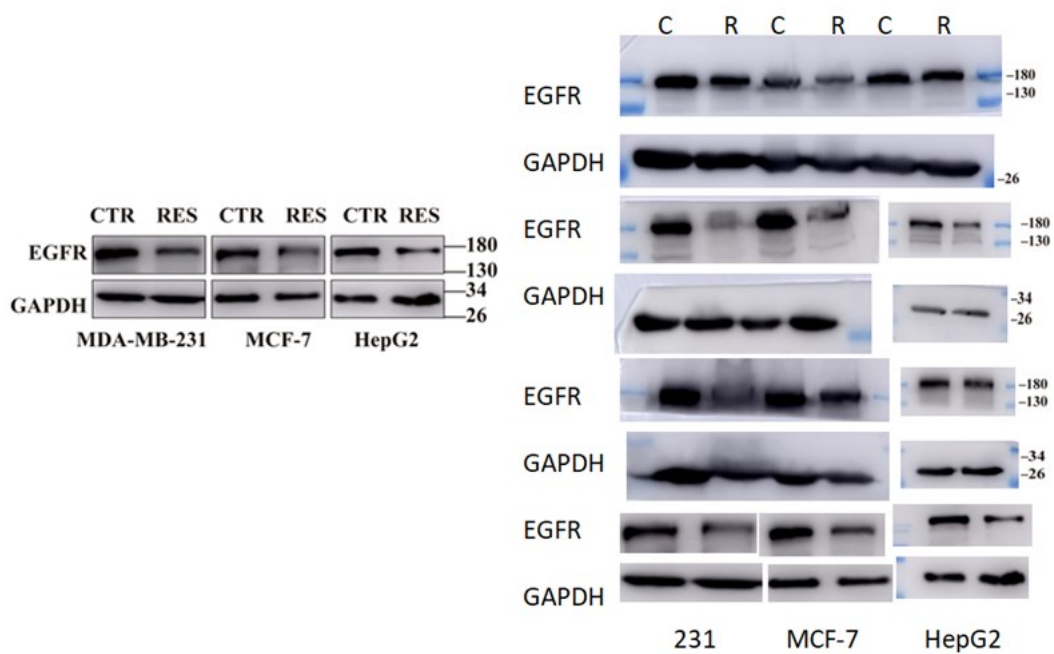



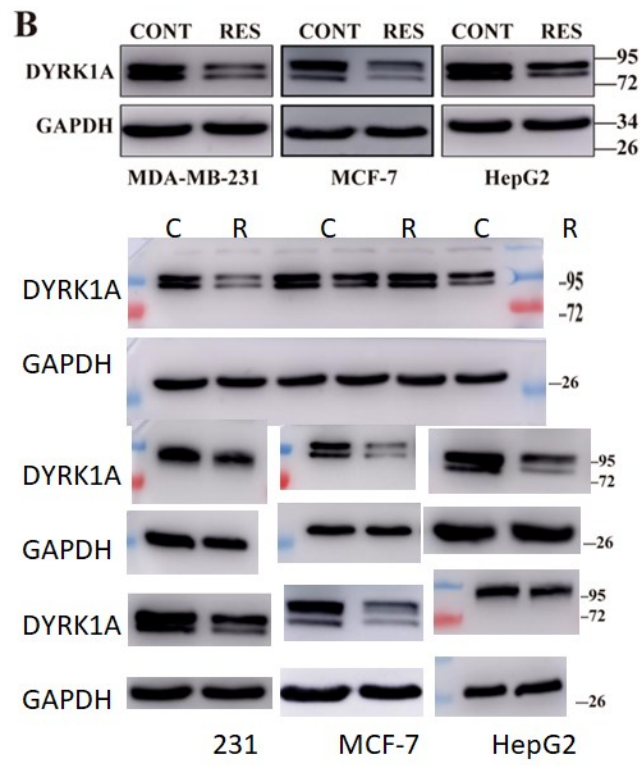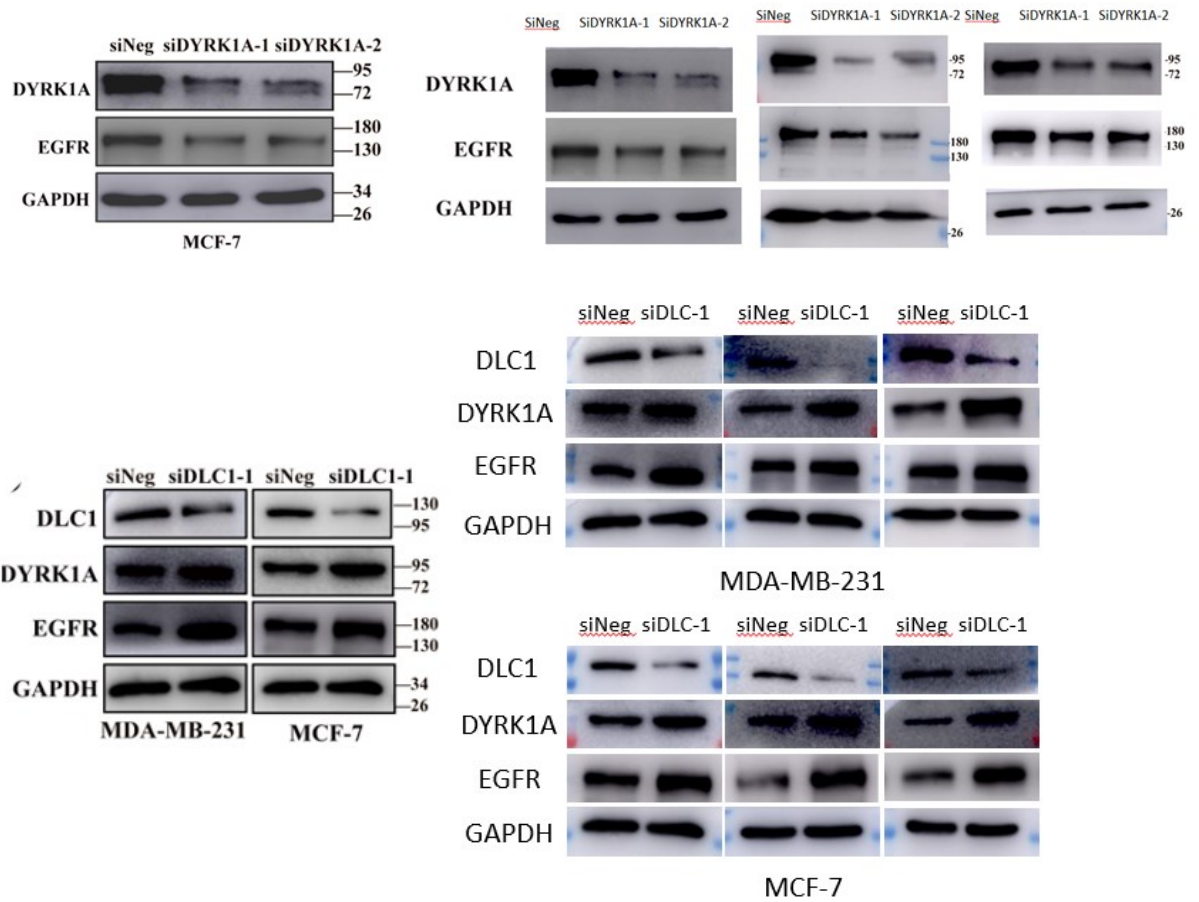

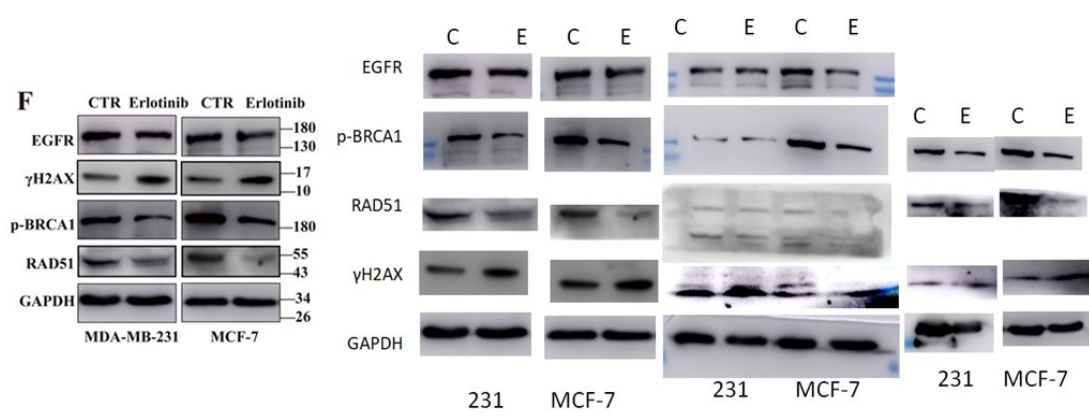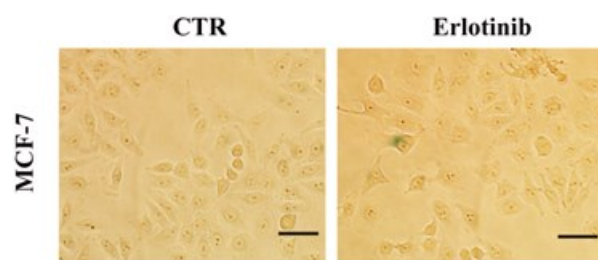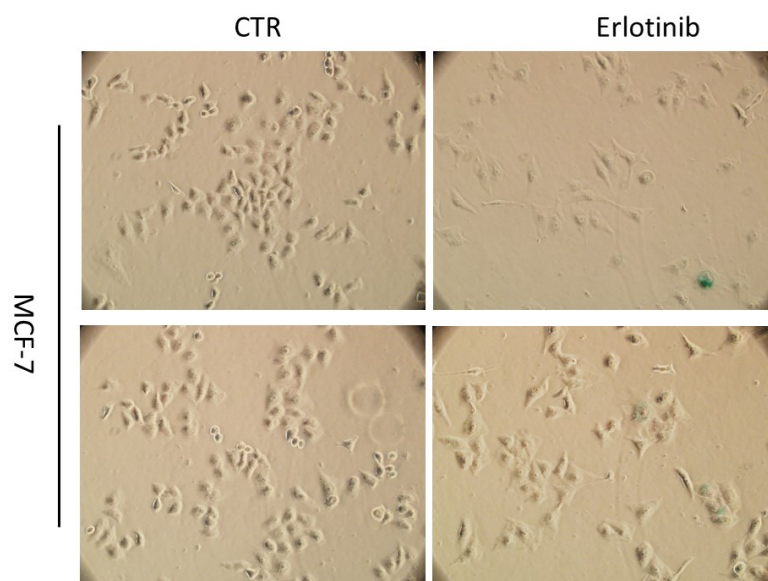

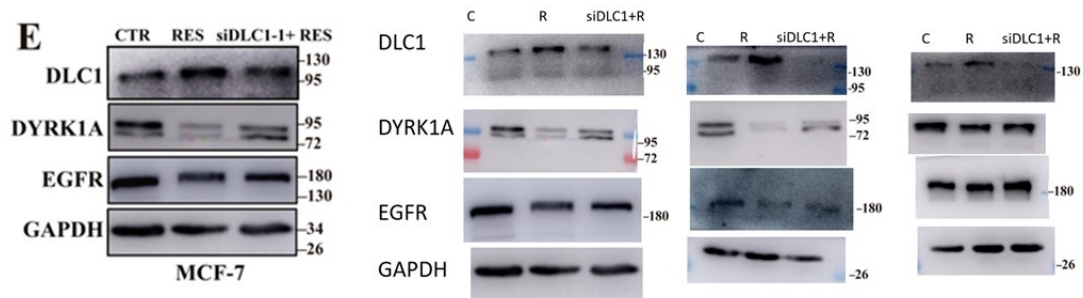

## ROS MDA-MB-231

|   | Group | Fluorescence value |        |        | Mean fluorescence value | Number of cells/ml/10 <sup>6</sup> | Mean fluorescence value/10 <sup>6</sup> | ratio C:R |
|---|-------|--------------------|--------|--------|-------------------------|------------------------------------|-----------------------------------------|-----------|
| 1 | 231C  | 1875.1             | 1873.8 | 1866.6 | 1871.83                 | 3.07                               | 609.72                                  | 1:1.33    |
|   | 231R  | 1443.6             | 1433.3 | 1559.1 | 1478.67                 | 1.82                               | 812.45                                  |           |
| 2 | 231C  | 1009.1             | 922.75 | 977.52 | 969.79                  | 1.5                                | 646.53                                  | 1:1.56    |
|   | 231R  | 637.3              | 637.62 | 633.87 | 636.26                  | 0.63                               | 1009.94                                 |           |
| 3 | 231C  | 1037.1             | 1033.9 | 1024.7 | 1031.90                 | 1.495                              | 690.23                                  | 1:1.49    |
|   | 231R  | 564.64             | 658.61 | 660.07 | 627.77                  | 0.61                               | 1029.14                                 |           |

## ROS MCF-7

|   | Group   | Fluorescence value |        |         | Mean fluorescence value | Number of cells/ml/10 <sup>6</sup> | Mean fluorescence value/10 <sup>6</sup> | ratio C:R |
|---|---------|--------------------|--------|---------|-------------------------|------------------------------------|-----------------------------------------|-----------|
| 1 | MCF-7C  | 1310.2             | 1317.5 | 1499.8  | 1375.83                 | 2.8                                | 491.37                                  | 1:1.26    |
|   | MCF-7R  | 887.87             | 886.22 | 1206.32 | 993.47                  | 1.6                                | 620.92                                  |           |
| 2 | MCF-7C  | 930.53             | 945.73 | 969.67  | 948.64                  | 2                                  | 474.32                                  | 1:1.90    |
|   | MCF-7R  | 1018.4             | 1024.2 | 1032.4  | 1025.00                 | 1.14                               | 899.12                                  |           |
| 3 | MCF-7 C | 1574.1             | 1541.9 | 1535.6  | 1550.53                 | 6.16                               | 251.71                                  | 1:98      |
|   | MCF-7 R | 1658.2             | 1657.7 | 1790.7  | 1702.20                 | 3.42                               | 497.72                                  |           |

ROS      HepG2

|   | Group   | Fluorescence value |        |        | Mean fluorescence value | Number of cells/ml/10 <sup>6</sup> | Mean fluorescence value/10 <sup>6</sup> | ratio C:R |
|---|---------|--------------------|--------|--------|-------------------------|------------------------------------|-----------------------------------------|-----------|
| 1 | HepG2 C | 227.22             | 211.73 | 222.81 | 220.59                  | 2.56                               | 86.17                                   | 1:1.63    |
|   | HepG2 R | 195.81             | 198.6  | 259.37 | 217.93                  | 1.55                               | 140.60                                  |           |
| 2 | HepG2 C | 207.7              | 209.23 | 197.84 | 204.92                  | 3                                  | 68.31                                   | 1:1.76    |
|   | HepG2 R | 190.51             | 235.23 | 225.19 | 216.98                  | 1.8                                | 120.54                                  |           |
| 3 | HepG2 C | 983.4              | 993.75 | 989.52 | 988.89                  | 9.8                                | 100.91                                  | 1:1.39    |
|   | HepG2 R | 1068.7             | 1052.3 | 1043.9 | 1054.97                 | 7.5                                | 140.66                                  |           |

**D**

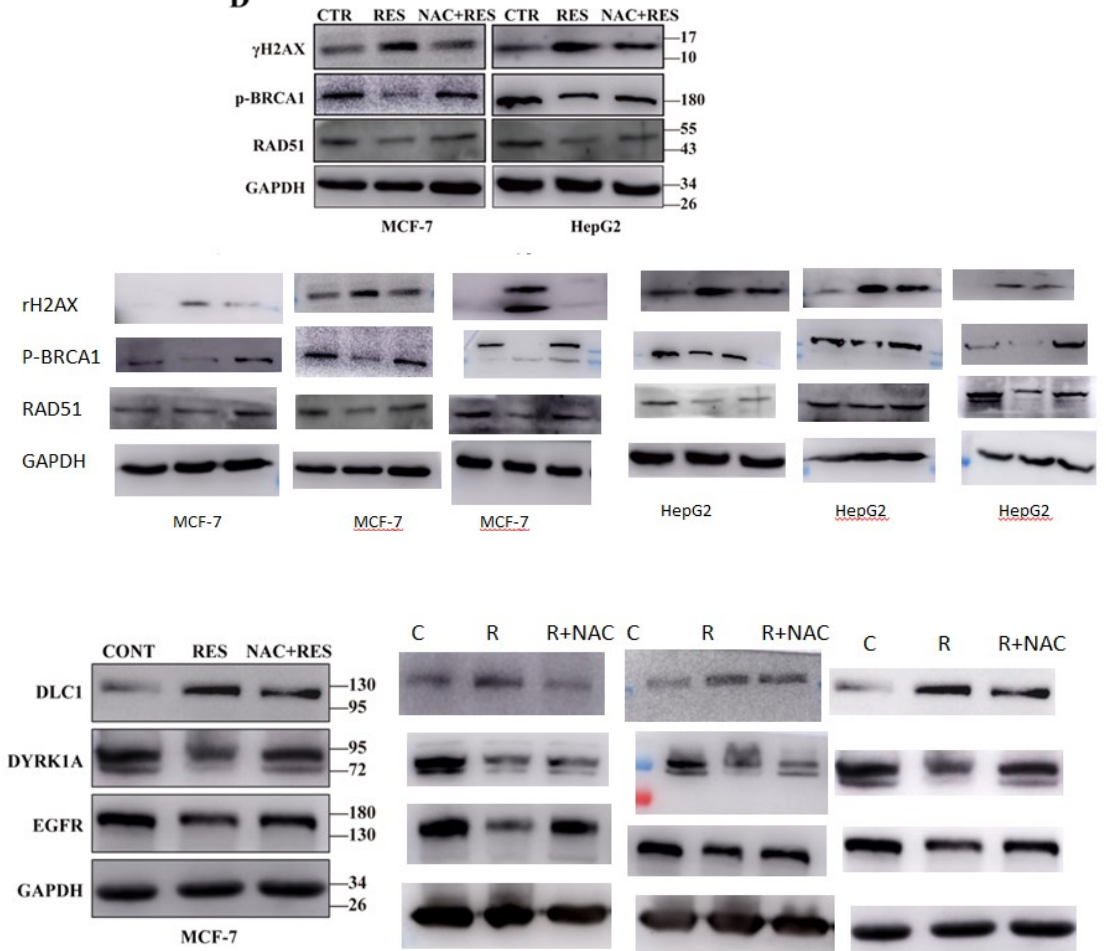



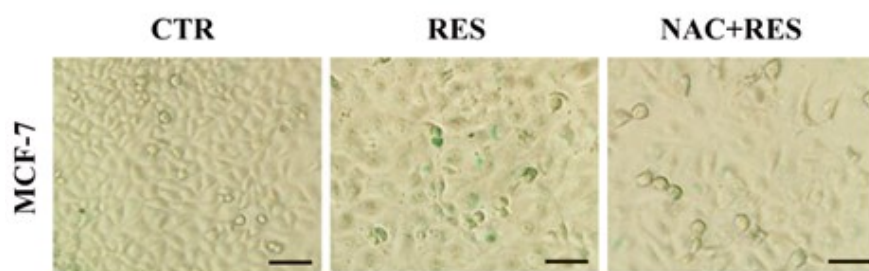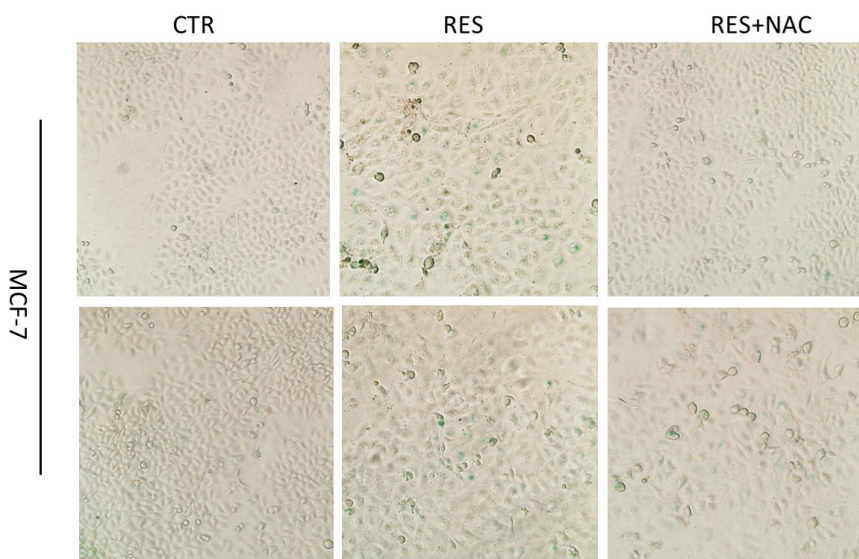

**CTR**

**0.5 mM RES**

**1 mM RES**

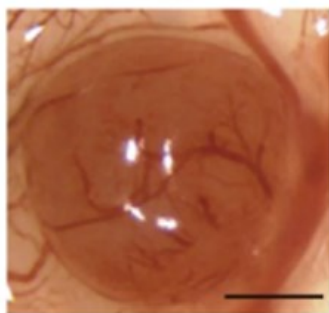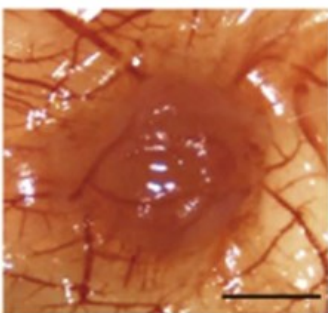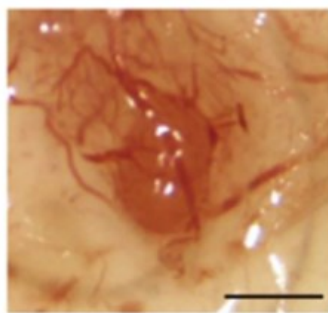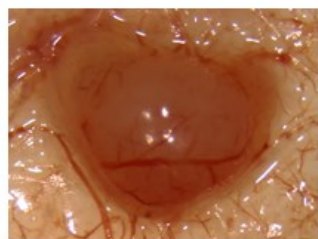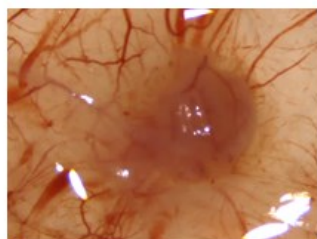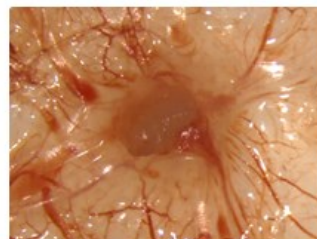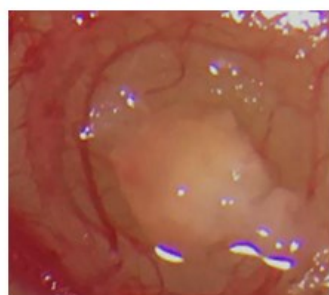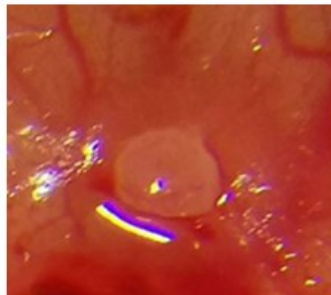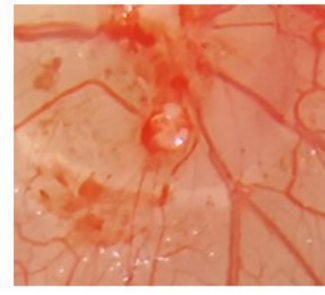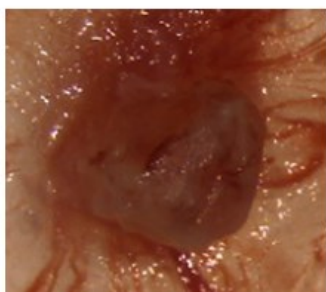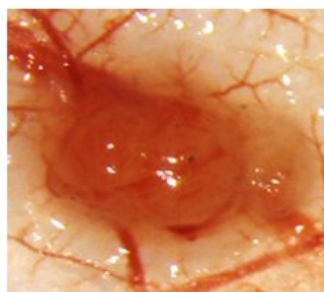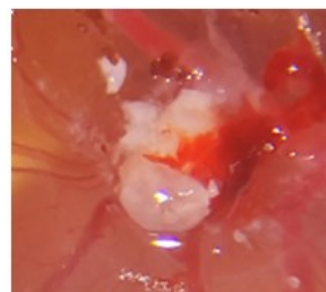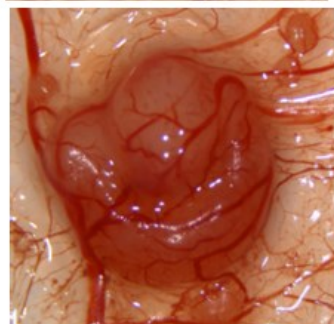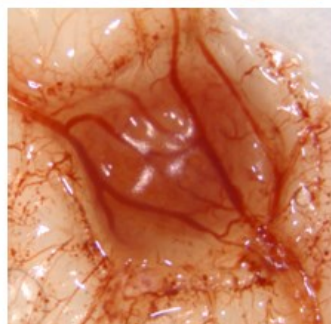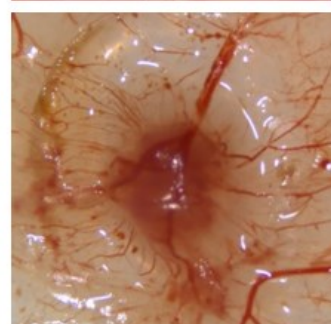

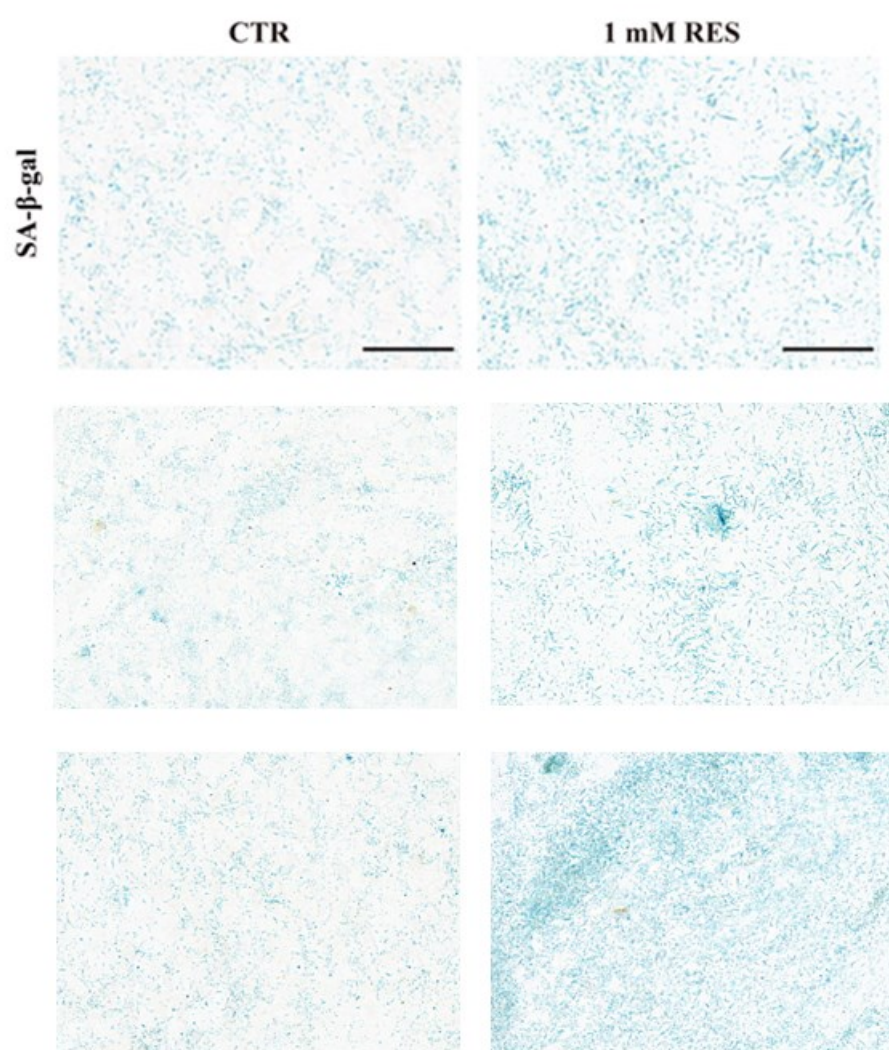



C

R

DLCI

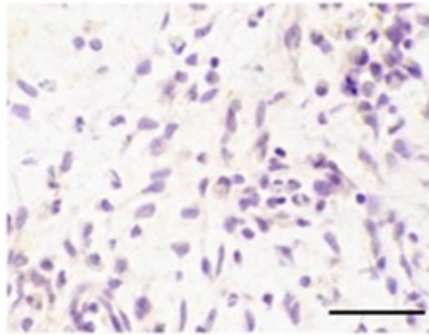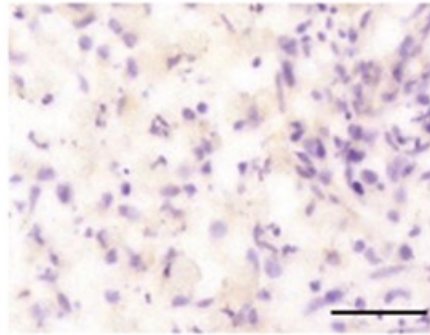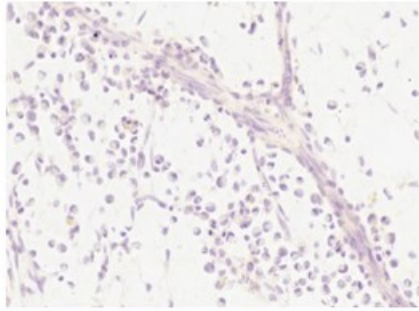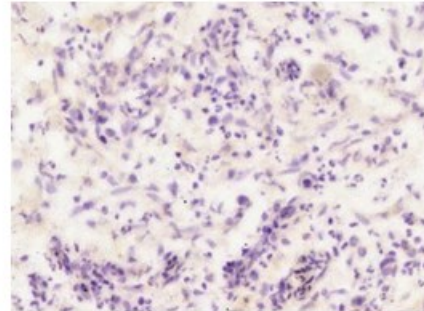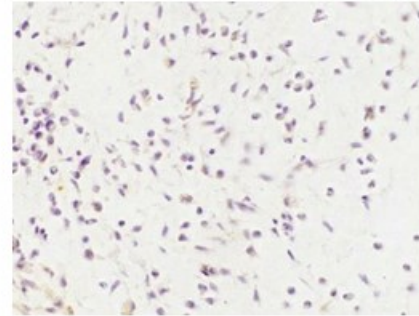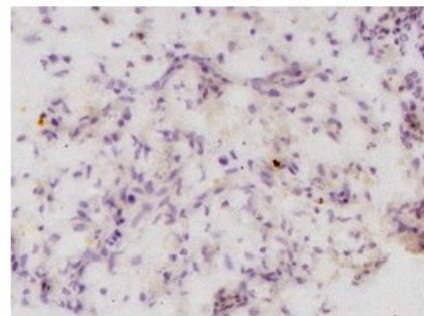

Supplement: d2fo01188c1.pdf [file d2fo01188c1.pdf]
